# Supplementary material
Source: PubMed Central journal article supplement (PMC11617068)
Supplement: NIHMS1910586-supplement-Supplement_1.pdf [file NIHMS1910586-supplement-Supplement_1.pdf]

---

**Supplementary information**

---

**Functional T cells are capable of  
supernumerary cell division and longevity**

---

In the format provided by the  
authors and unedited

Figure 1 Gating Schemes

Example gating used in Fig 1a, b

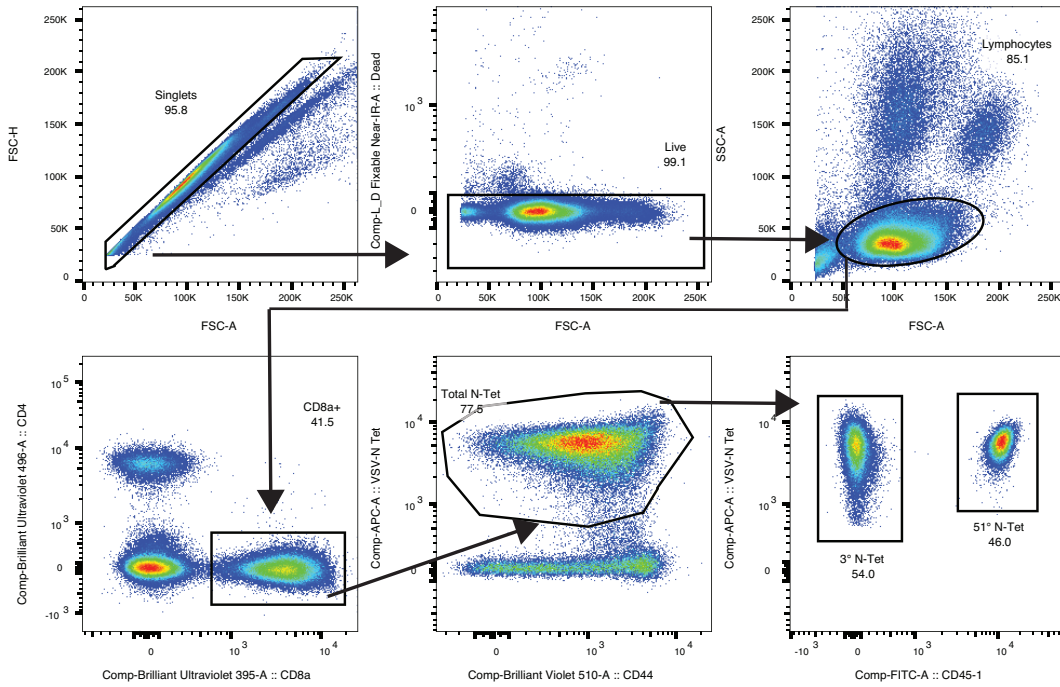

Example gating used in Fig 1c

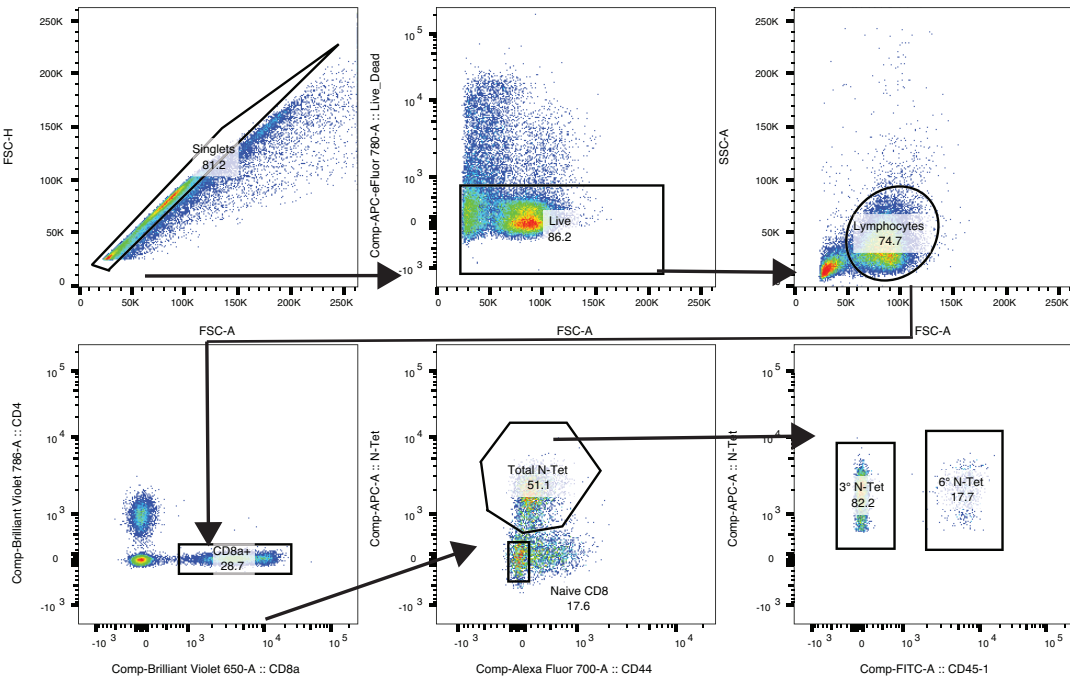

Supplementary fig. 1: Example of gating strategies to detect endogenous and transferred CD45.1+ tetramer+ cells in fig. 1

| Figure 1a: 60+ Day Boosting |                |                          |                |                          |                |      |    |
|-----------------------------|----------------|--------------------------|----------------|--------------------------|----------------|------|----|
| Days post 4 <sup>+</sup>    | number of mice | Days post 4 <sup>+</sup> | number of mice | Days post 4 <sup>+</sup> | number of mice |      |    |
| 0                           | 4              | 590                      | 4              | 1749                     | 10             | 2688 | 10 |
| 8                           | 4              | 619                      | 4              | 1757                     | 10             | 2708 | 10 |
| 15                          | 4              | 762                      | 4              | 1809                     | 10             | 2710 | 10 |
| 29                          | 4              | 771                      | 4              | 1820                     | 9              | 2719 | 10 |
| 36                          | 4              | 778                      | 4              | 1856                     | 9              | 2739 | 10 |
| 50                          | 4              | 799                      | 4              | 1876                     | 9              | 2771 | 10 |
| 64                          | 4              | 828                      | 4              | 1878                     | 10             | 2779 | 10 |
| 71                          | 4              | 842                      | 4              | 1885                     | 10             | 2836 | 8  |
| 85                          | 4              | 864                      | 4              | 1913                     | 10             | 2845 | 8  |
| 99                          | 4              | 899                      | 4              | 1939                     | 10             | 2898 | 8  |
| 113                         | 4              | 918                      | 3              | 1956                     | 10             | 2901 | 15 |
| 128                         | 4              | 925                      | 3              | 1976                     | 10             | 2908 | 15 |
| 135                         | 3              | 941                      | 3              | 2009                     | 10             | 2935 | 15 |
| 146                         | 3              | 948                      | 3              | 2017                     | 10             | 2961 | 15 |
| 191                         | 5              | 988                      | 3              | 2037                     | 10             | 2971 | 15 |
| 198                         | 5              | 1016                     | 3              | 2059                     | 10             | 3051 | 15 |
| 205                         | 5              | 1025                     | 3              | 2087                     | 10             | 3039 | 15 |
| 226                         | 5              | 1039                     | 3              | 2095                     | 10             | 3092 | 15 |
| 240                         | 5              | 1081                     | 3              | 2149                     | 10             | 3098 | 10 |
| 254                         | 5              | 1102                     | 3              | 2157                     | 10             | 3105 | 10 |
| 261                         | 5              | 1108                     | 3              | 2180                     | 10             | 3159 | 9  |
| 267                         | 5              | 1151                     | 3              | 2220                     | 10             | 3167 | 9  |
| 275                         | 5              | 1158                     | 5              | 2228                     | 10             | 3220 | 9  |
| 289                         | 5              | 1165                     | 5              | 2283                     | 10             | 3227 | 9  |
| 317                         | 5              | 1218                     | 5              | 2297                     | 10             | 3282 | 9  |
| 324                         | 5              | 1394                     | 5              | 2305                     | 10             | 3284 | 10 |
| 331                         | 5              | 1403                     | 5              | 2312                     | 10             | 3291 | 10 |
| 352                         | 5              | 1448                     | 5              | 2359                     | 10             | 3346 | 10 |
| 379                         | 5              | 1455                     | 5              | 2372                     | 10             | 3354 | 10 |
| 380                         | 5              | 1471                     | 3              | 2430                     | 10             | 3408 | 12 |
| 387                         | 5              | 1476                     | 3              | 2438                     | 10             | 3416 | 9  |
| 394                         | 5              | 1485                     | 3              | 2491                     | 10             | 3471 | 9  |
| 419                         | 5              | 1532                     | 3              | 2507                     | 10             |      |    |
| 444                         | 5              | 1577                     | 3              | 2514                     | 10             |      |    |
| 450                         | 5              | 1593                     | 3              | 2521                     | 10             |      |    |
| 457                         | 5              | 1631                     | 3              | 2548                     | 10             |      |    |
| 477                         | 5              | 1648                     | 3              | 2568                     | 10             |      |    |
| 505                         | 5              | 1659                     | 3              | 2576                     | 10             |      |    |
| 513                         | 5              | 1668                     | 10             | 2596                     | 10             |      |    |
| 520                         | 5              | 1675                     | 10             | 2610                     | 10             |      |    |
| 541                         | 5              | 1682                     | 10             | 2638                     | 10             |      |    |
| 583                         | 4              | 1716                     | 10             | 2646                     | 10             |      |    |

| Figure 1b: 28-34 Day Boosting |                |                          |                |                          |                |
|-------------------------------|----------------|--------------------------|----------------|--------------------------|----------------|
| Days post 4 <sup>+</sup>      | number of mice | Days post 4 <sup>+</sup> | number of mice | Days post 4 <sup>+</sup> | number of mice |
| 0                             | 5              | 556                      | 5              | 1099                     | 9              |
| 8                             | 5              | 566                      | 5              | 1107                     | 9              |
| 28                            | 5              | 587                      | 5              | 1128                     | 9              |
| 36                            | 5              | 595                      | 5              | 1136                     | 9              |
| 56                            | 5              | 615                      | 5              | 1156                     | 9              |
| 64                            | 5              | 617                      | 10             | 1158                     | 5              |
| 86                            | 5              | 629                      | 10             | 1164                     | 5              |
| 88                            | 5              | 644                      | 10             | 1185                     | 5              |
| 97                            | 5              | 651                      | 10             | 1195                     | 5              |
| 114                           | 5              | 673                      | 10             | 1217                     | 4              |
| 125                           | 5              | 681                      | 10             | 1224                     | 5              |
| 143                           | 5              | 701                      | 10             | 1247                     | 5              |
| 154                           | 5              | 703                      | 10             | 1250                     | 5              |
| 171                           | 5              | 710                      | 10             | 1256                     | 5              |
| 175                           | 5              | 730                      | 10             | 1280                     | 5              |
| 182                           | 5              | 740                      | 10             | 1288                     | 5              |
| 204                           | 5              | 762                      | 10             | 1308                     | 5              |
| 211                           | 5              | 770                      | 10             | 1316                     | 5              |
| 234                           | 5              | 791                      | 10             | 1337                     | 5              |
| 244                           | 5              | 792                      | 10             | 1339                     | 5              |
| 265                           | 5              | 799                      | 9              | 1346                     | 10             |
| 268                           | 10             | 825                      | 9              | 1367                     | 10             |
| 275                           | 10             | 833                      | 9              | 1375                     | 10             |
| 295                           | 10             | 857                      | 9              | 1395                     | 10             |
| 303                           | 10             | 866                      | 9              | 1406                     | 10             |
| 323                           | 10             | 888                      | 9              | 1423                     | 10             |
| 331                           | 10             | 890                      | 10             |                          |                |
| 351                           | 10             | 897                      | 10             |                          |                |
| 353                           | 5              | 918                      | 10             |                          |                |
| 360                           | 5              | 926                      | 10             |                          |                |
| 381                           | 5              | 947                      | 10             |                          |                |
| 391                           | 5              | 958                      | 10             |                          |                |
| 413                           | 5              | 979                      | 10             |                          |                |
| 421                           | 5              | 980                      | 10             |                          |                |
| 441                           | 5              | 986                      | 7              |                          |                |
| 443                           | 5              | 1009                     | 7              |                          |                |
| 454                           | 5              | 1016                     | 7              |                          |                |
| 470                           | 5              | 1038                     | 7              |                          |                |
| 499                           | 5              | 1046                     | 7              |                          |                |
| 505                           | 5              | 1065                     | 7              |                          |                |
| 528                           | 5              | 1071                     | 10             |                          |                |
| 535                           | 5              | 1078                     | 9              |                          |                |

**Supplementary table 1:** The number of mice at each time point in fig. 1a (60+ day boosting) and fig. 1b (28-34 day boosting).

Figure 2b Gating Scheme

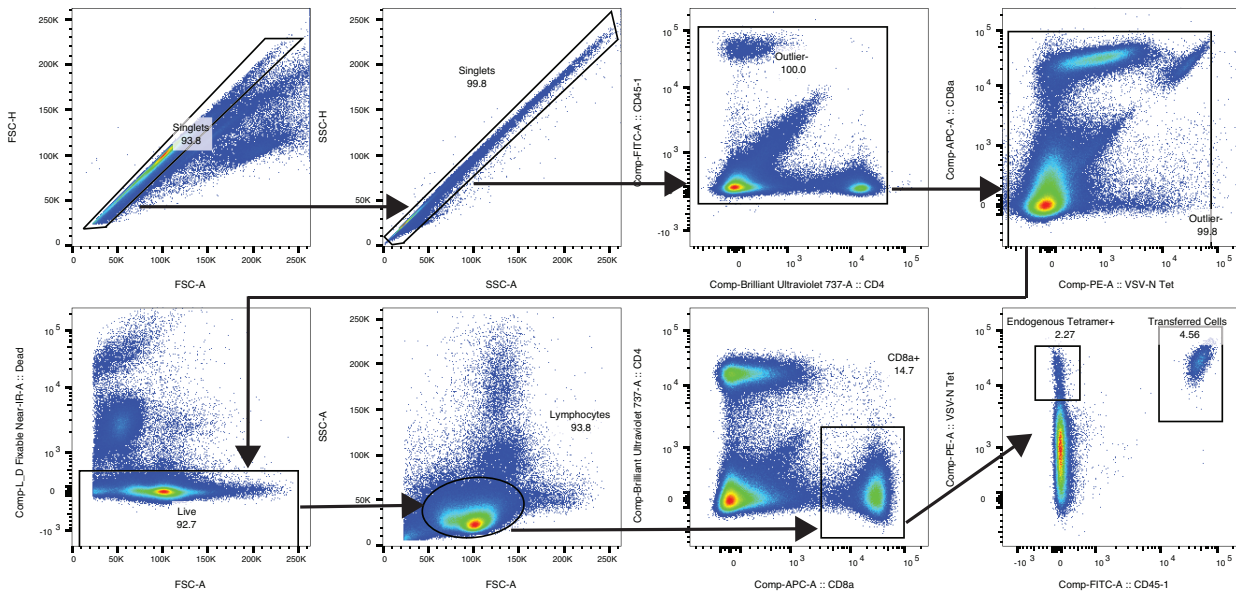

Supplementary fig. 2: Gating scheme for cells shown in fig. 2b.

Figure 3 Gating Schemes  
Extracellular only stain

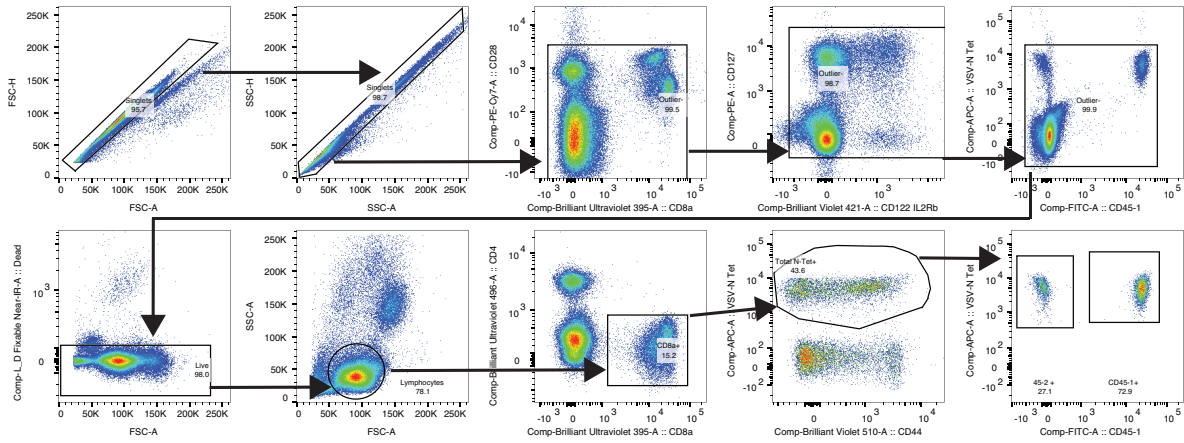

Extracellular and intracellular stain

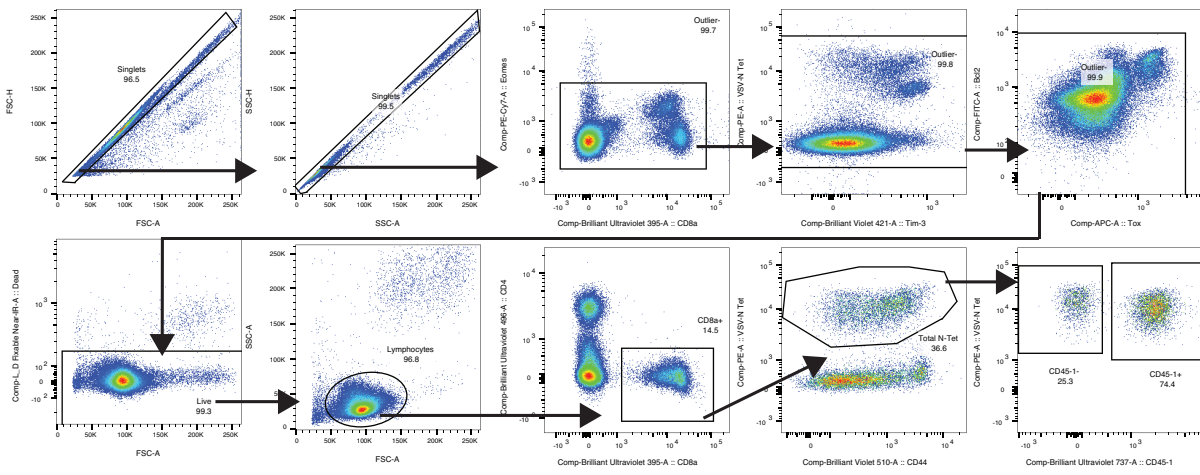

Supplementary fig. 3: Gating schemes for cells in fig. 3

Figure 4 Gating Schemes

Figure 4a gating scheme

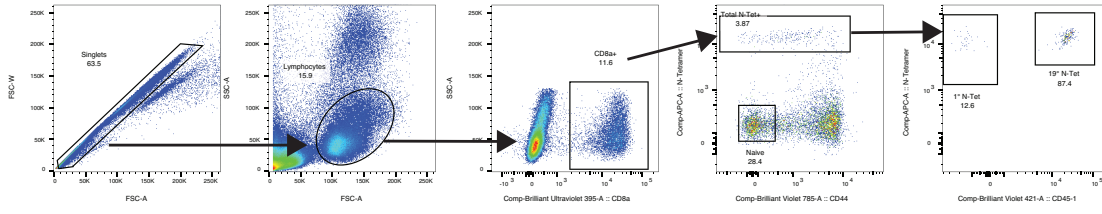

Figure 4e gating scheme

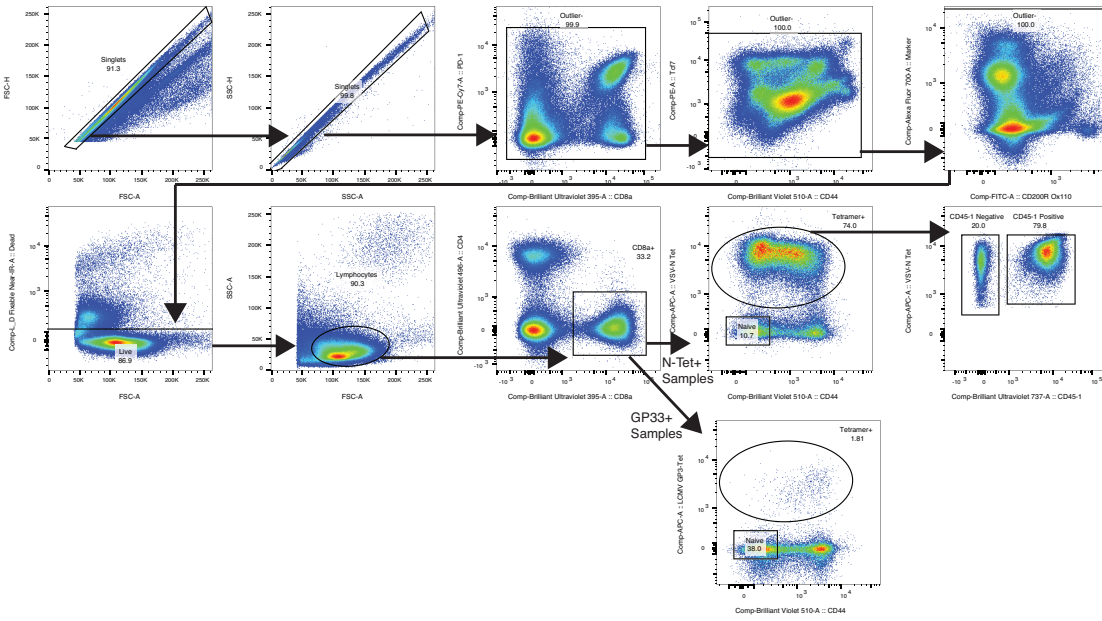

Figure 4g gating scheme

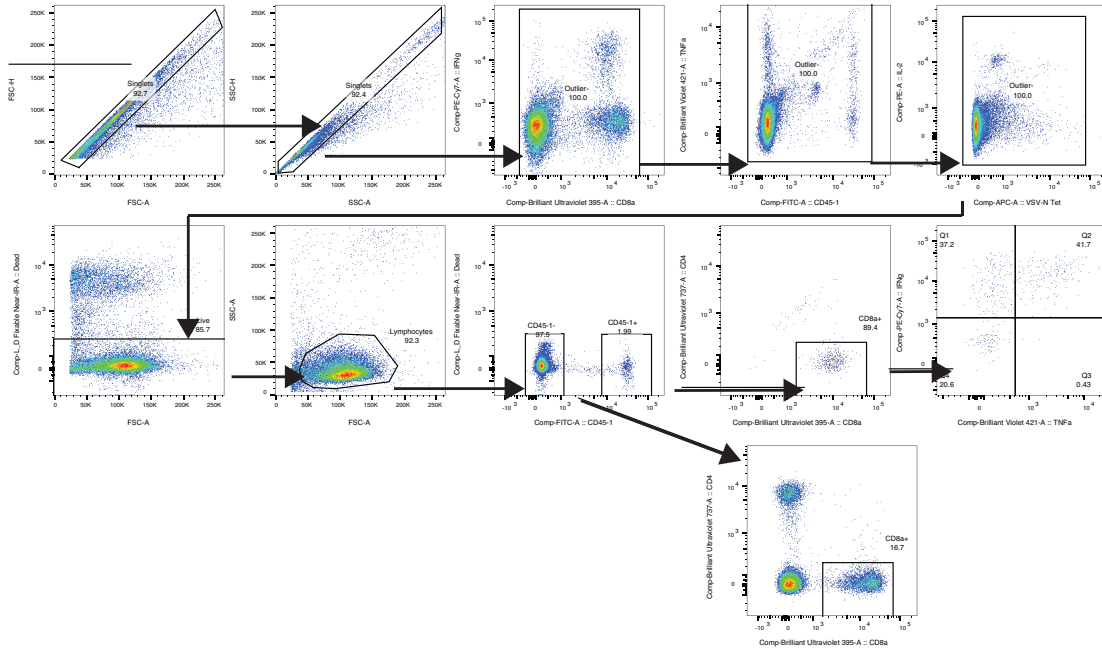

Supplementary fig. 4: Gating schemes for cells in fig. 4.
